# Supplementary material for: Identification of MST1 as a potential early detection biomarker for colorectal cancer through a proteomic approach
Source: PubMed Central journal article supplement (PMC5660227; doi:10.1038/s41598-017-14539-x), 2017-10-27
Supplement: 41598_2017_14539_MOESM1_ESM.pdf [file 41598_2017_14539_MOESM1_ESM.pdf]

# Identification of MST1 as a potential early detection biomarker for colorectal cancer through a proteomic approach

Jiekai Yu<sup>1+</sup>, Xiaohui Zhai<sup>2,1+</sup>, Xiaofen Li<sup>1</sup>, Chenhan Zhong<sup>1</sup>, Cheng Guo<sup>1</sup>, Fuquan Yang<sup>4</sup>, Ying Yuan<sup>3</sup>, Shu Zheng<sup>1,5\*</sup>

<sup>1</sup> Cancer Institute (Key Laboratory of Cancer Prevention and Intervention, China National Ministry of Education), The Second Affiliated Hospital, School of Medicine, Zhejiang University, Hangzhou, 310009, China

<sup>2</sup> Department of Medical Oncology, The Sixth Affiliated Hospital of Sun-Yat Sen University, Guangzhou, 510655, China

<sup>3</sup> Department of Medical Oncology, The Second Affiliated Hospital, School of Medicine, Zhejiang University, Hangzhou, 310009, China

<sup>4</sup> Proteomic Platform, Institute of Biophysics, Chinese Academy of Sciences, Beijing, 100101, China

<sup>5</sup> Research Center for Air Pollution and Health, School of Medicine, Zhejiang University, Hangzhou, 310058, China

+ These authors contributed equally to this work.

**\*Corresponding address:** Professor Shu Zheng, Cancer Institute, the Second Affiliated Hospital, Zhejiang University School of Medicine, China. Tel.: +086-571-87784501, E-mail: zhengshu@zju.edu.cn

Supplementary Information

Supplementary Figure S1: Scatterplot of the MST1 ELISA concentrations in sera samples of lung cancer, gastric cancer, esophageal cancer, CRC before treatment and CRC after treatment.

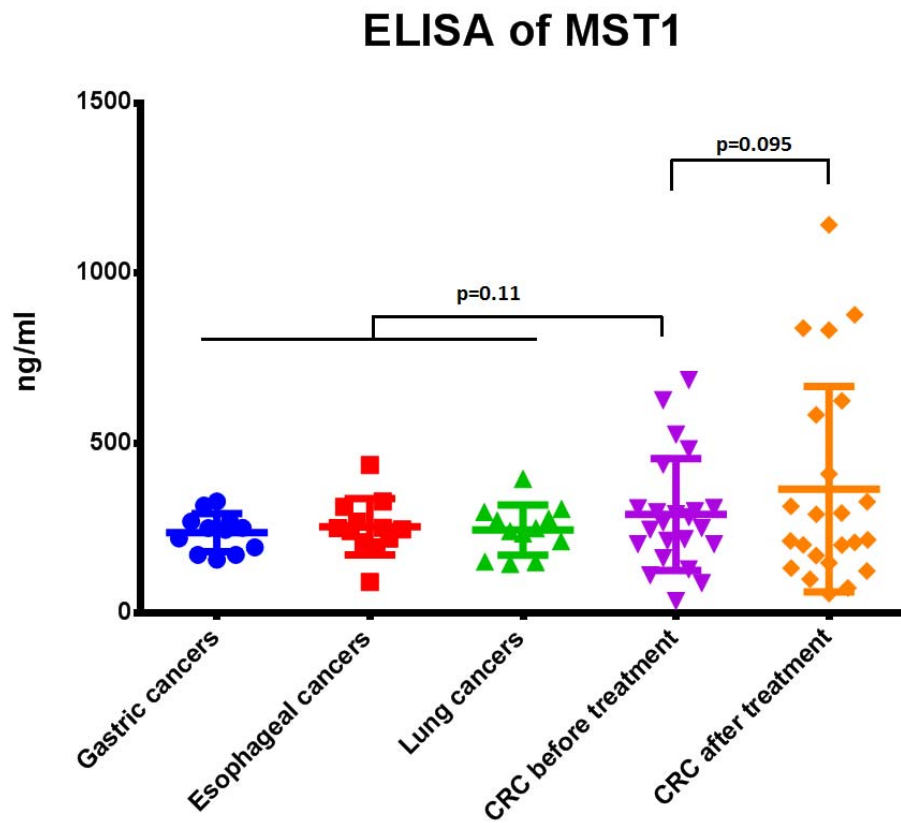

Supplementary Figure S2: Full-length blots of representative western blot image.

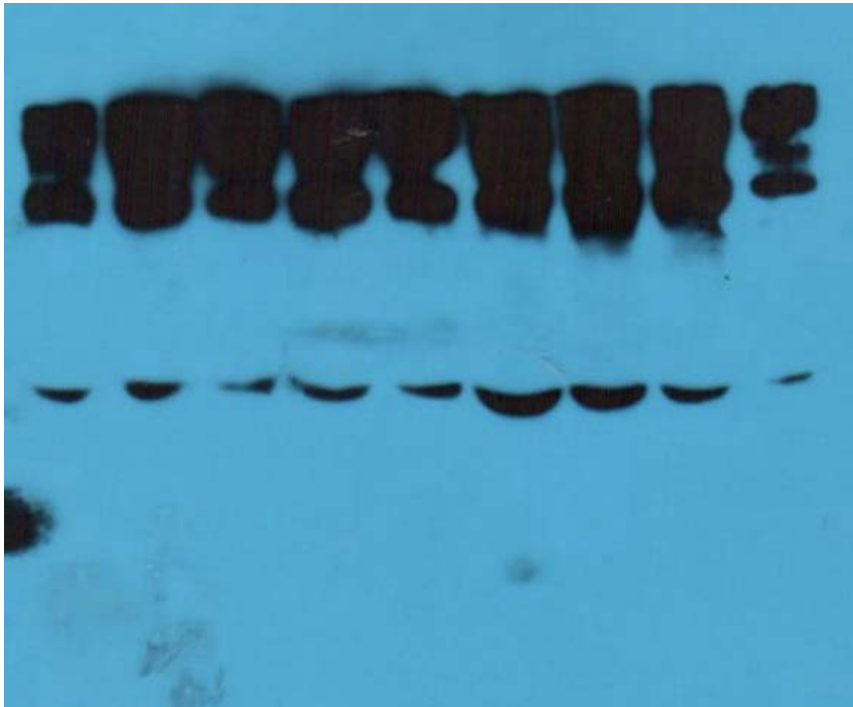

**Supplementary Table S1.** Information of CRC samples and other cancers samples.

| Samples             | Colorectal<br>Cancer | Stomach<br>cancer | Esophageal<br>cancer | Lung cancer |
|---------------------|----------------------|-------------------|----------------------|-------------|
| Male / Female       | 13/10                | 3/9               | 9/3                  | 3/9         |
| Average age,y       | 54.10                | 59.92             | 59.08                | 63.75       |
| Stage (I/II/III/IV) | 1/3/8/11             | 2/4/4/2           | 2/4/4/2              | 3/1/5/3     |
| Total Number        | 23                   | 12                | 12                   | 12          |
